# Supplementary material for: Reproductive tract extracellular vesicles are sufficient to transmit intergenerational stress and program neurodevelopment
Source: PubMed Central journal article supplement (PMC7083921; doi:10.1038/s41467-020-15305-w), 2020-03-20
Supplement: 41467_2020_15305_MOESM1_ESM.pdf [file 41467_2020_15305_MOESM1_ESM.pdf]

## Supplementary Information for

### **Reproductive tract extracellular vesicles are sufficient to transmit intergenerational stress and program neurodevelopment**

Jennifer C Chan<sup>1</sup>, Christopher P Morgan<sup>2</sup>, N Adrian Leu<sup>1</sup>, Amol Shetty<sup>3</sup>, Yasmine M Cisse<sup>2</sup>, Bridget M Nugent<sup>2</sup>, Kathleen E Morrison<sup>2</sup>, Eldin Jašarević<sup>2</sup>, Weiliang Huang<sup>4</sup>, Nickole Kanyuch<sup>2</sup>, Ali B Rodgers<sup>1</sup>, Natarajan V Bhanu<sup>5</sup>, Dara S Berger<sup>6</sup>, Benjamin A Garcia<sup>5</sup>, Seth Ament<sup>3</sup>, Maureen Kane<sup>4</sup>, C Neill Epperson<sup>7</sup>, Tracy L Bale<sup>2</sup>

correspondence to: [tbale@som.umaryland.edu](mailto:tbale@som.umaryland.edu)

#### **This file includes:**

Supplementary Figures and Legends: 1-9

#### **Other Supplementary Materials for this manuscript includes the following:**

Supplementary Data 1: Results table from DEseq analysis of sperm miRNA

Supplementary Data 2: Statistics for qRT-PCR validation of sperm and EV RNA-sequencing

Supplementary Data 3: Baseline demographics and assessments including ACE questionnaire and STAI inventory for all subjects in human cohort

Supplementary Data 4: Data for raw caput epididymal histone mass spectrometry data

Supplementary Data 5: Results table from DEseq analysis of DC2 EV miRNA

Supplementary Data 6: Data for raw DC2 EV protein mass spectrometry data

Supplementary Data 7: GO terms for Figure 3e, E12.5 offspring brains from ICSI of sperm incubated with EVs collected from DC2 cells following treatment

Supplementary Data 8: Complete result Data for GO terms in E12.5 offspring brains from ICSI of sperm incubated with EVs collected from DC2 cells following treatment

Supplementary Data 9: Complete result Data for GO terms in E12.5 offspring placenta from ICSI of sperm incubated with EVs collected from DC2 cells following treatment

# Supplementary Figure 1

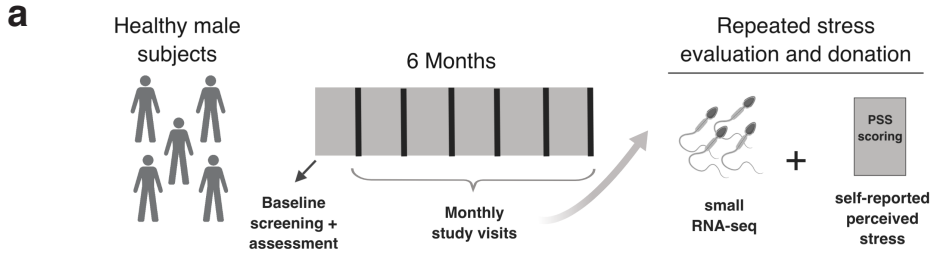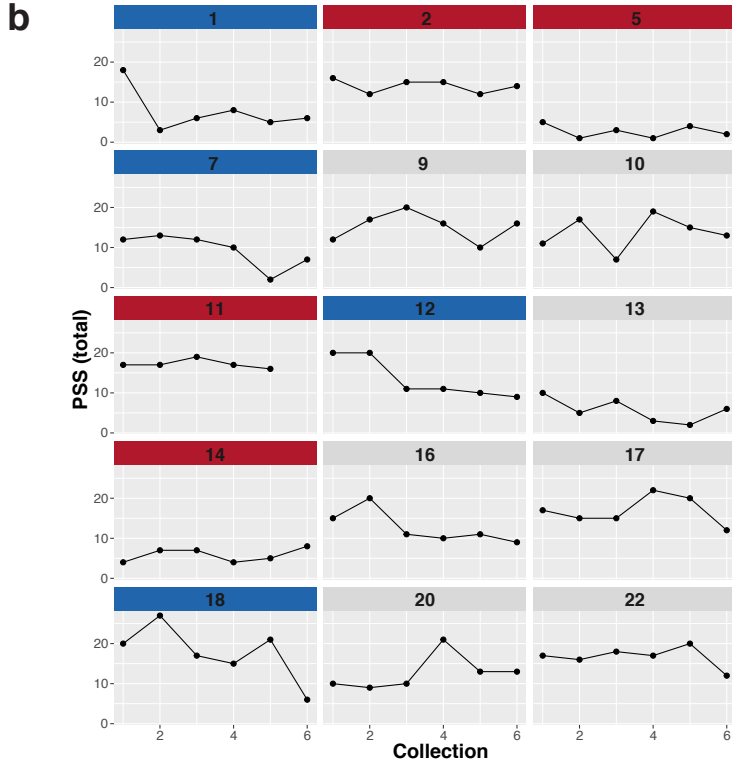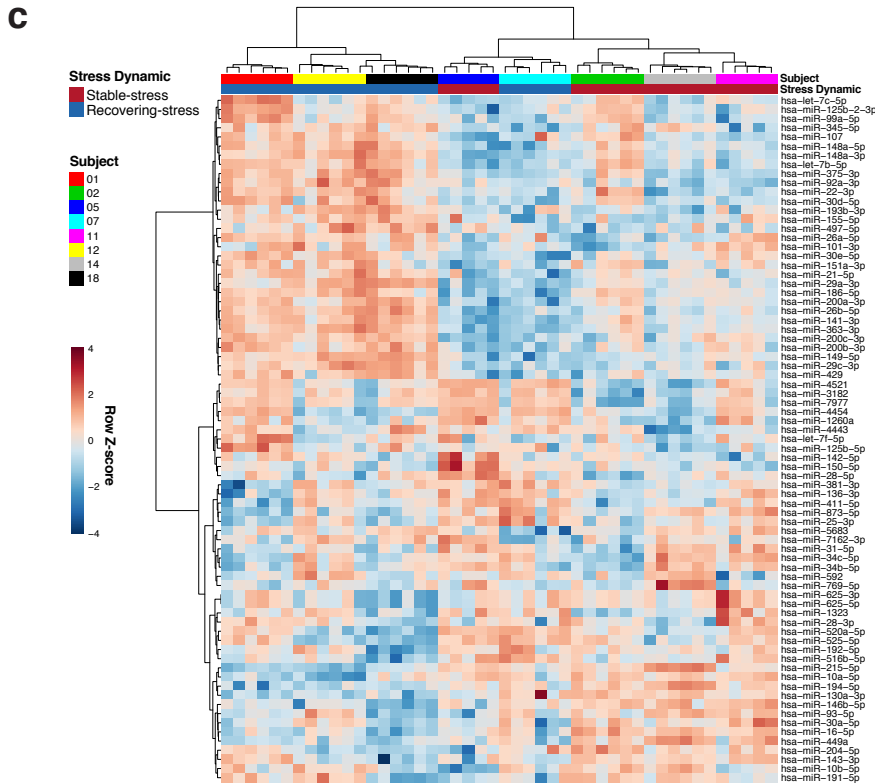

479 **Supplementary Figure 1. Between- and within-subject variation in human sperm**  
480 **miRNA expression patterns over time. (a)** To translationally probe our mouse model  
481 and examine the impact of prior stress experience and recovery on human sperm miRNA  
482 patterns, recruited healthy male subjects (N=15) completed monthly psychological  
483 inventories, including the Perceived Stress Scale (PSS), and donated sperm samples over  
484 6 months. **(b)** From self-reported PSS scores, we identified two phenotypic groups of  
485 subjects from which we could probe our mouse model findings: 1) One group of subjects,  
486 which best mimicked our mouse model, reported elevated perceived stress followed by  
487 an extended period of recovery (recovering-stress), defined as a drop in PSS score  $\geq 10$   
488 over the 6 months (blue bars, N=4), and 2) A comparison group with minimal variation in  
489 PSS score, regardless of the intensity of that stress (stable-stress) over 6 months (red bars,  
490 N=4). **(c)** Connections between subject sperm miRNA expression patterns are visualized  
491 in a heatmap of the 75 miRNA with the greatest between-subject variation (ranked by  
492 one-way ANOVA). Hierarchical clustering identified a single cluster that includes all  
493 subject samples (6 from each) from 3 of 4 subjects with a stable-stress dynamic, while  
494 excluding all others, and a second cluster was comprised of all samples from recovering-  
495 stress subjects that also included one of the stable-stress subjects (N=24 samples from  
496 stable-stress and N=22 samples from recovering-stress groups).

497

498

# Supplementary Figure 2

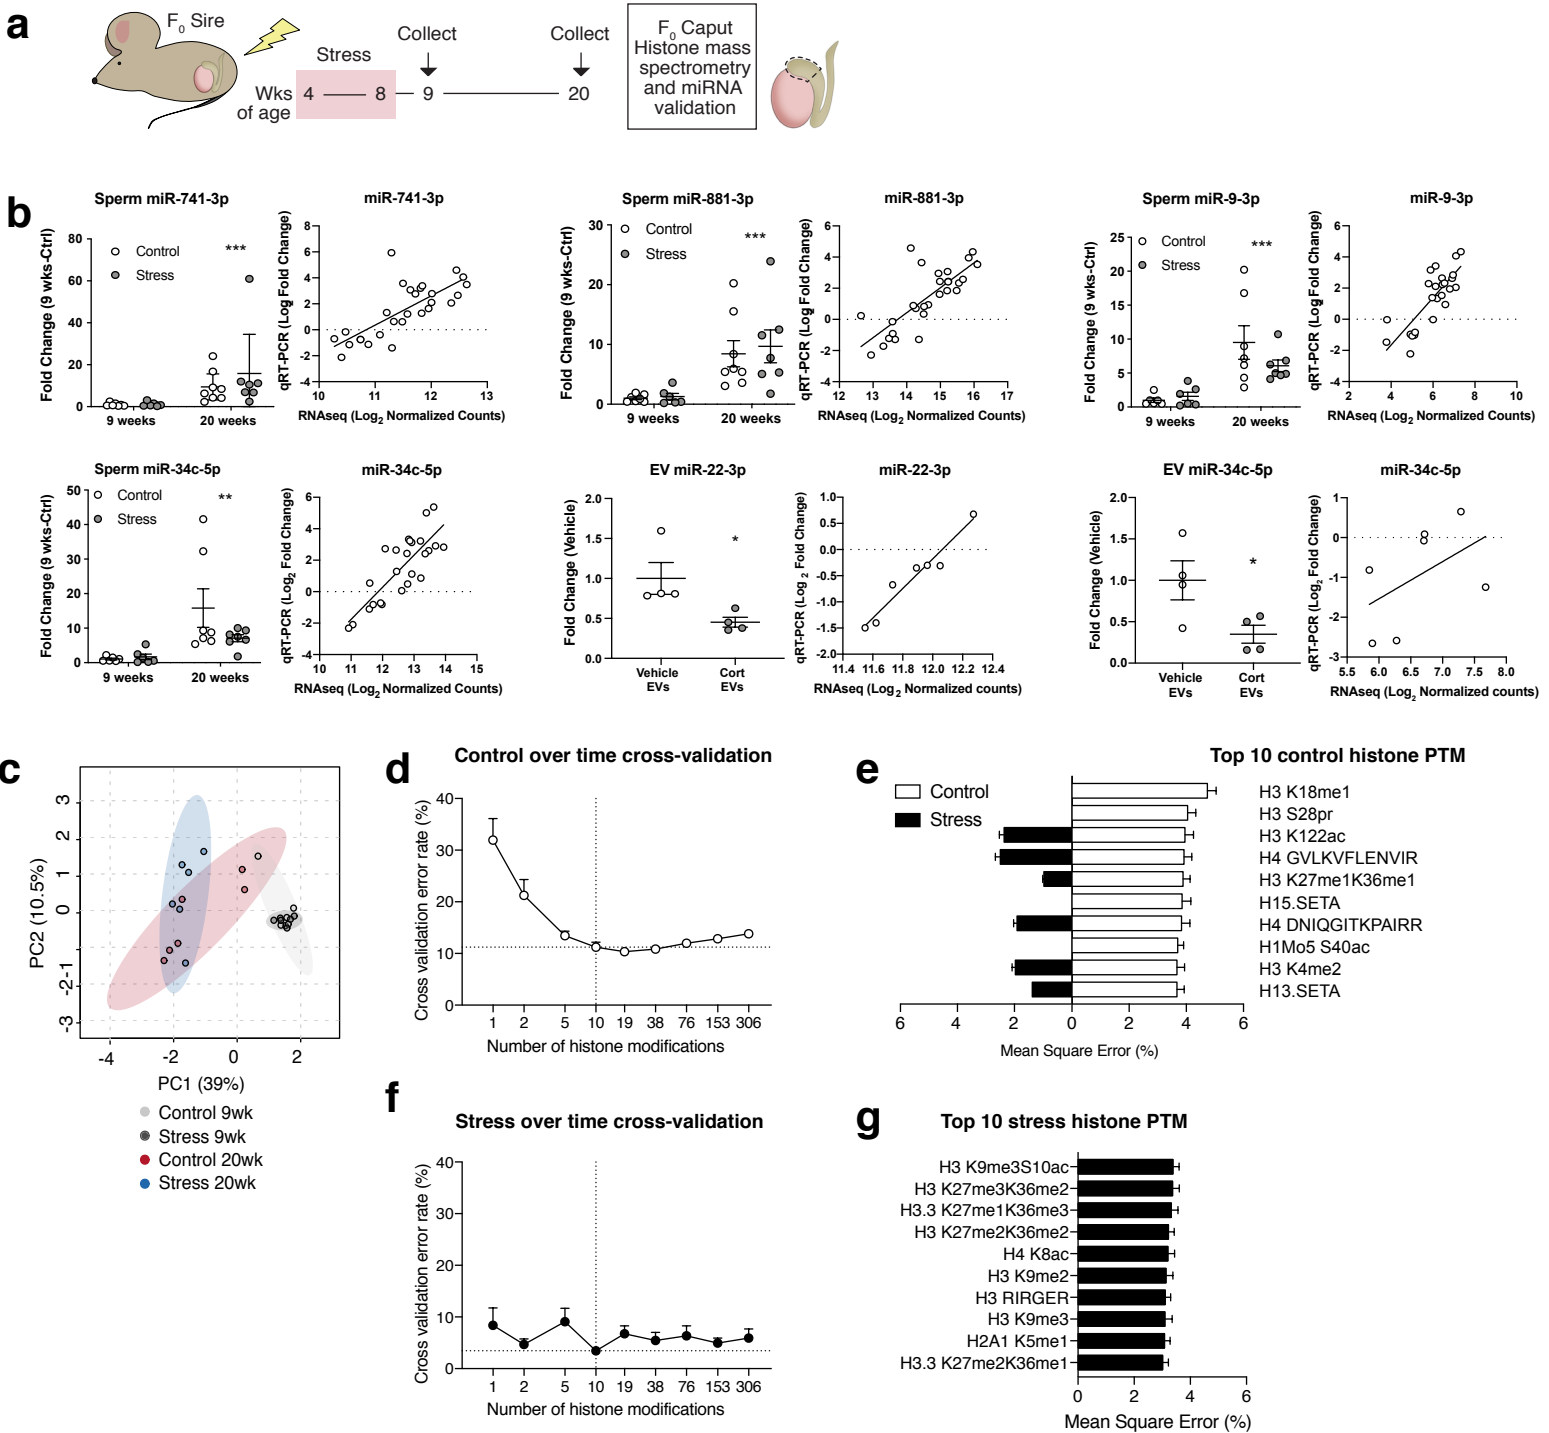

499 **Supplementary Figure 2. Stress recovery impacts histone modifications during**  
500 **epididymal maturation. (a)** Male mice experienced chronic stress from age 4-8 weeks  
501 and caput epididymal tissues were collected at 9- or 20-weeks. Histone post-translational  
502 modification (PTM) mass spectrometry was used to examine caput epididymal histone  
503 PTM profiles following stress and recovery. **(b)** Validation of age- (miR-741-3p and  
504 miR-881-3p) and stress- (miR-9-3p and miR-34c-5p) related differences in sperm  
505 miRNA and corticosterone-related differences in DC2 EVs (miR-22-3p and miR-34c-5p)  
506 by quantitative RT-PCR. See methods for Ns. Full statistics are provided in  
507 Supplementary Table 2. Error bars represent mean  $\pm$  SEM. **(c)** Unbiased principle  
508 components analysis of caput epididymal tissues at 9- and 20-weeks based on all detected  
509 histone PTMs, showing divergence following recovery but not immediately following  
510 stress (ellipses are 95% confidence intervals). **(d)** Histone PTM ratios were analyzed by  
511 Random Forests, identifying the top ten histone PTMs that best described epididymal  
512 tissue maturation from 9-to-20-weeks (i.e. identify the top ten histone PTMs that  
513 contribute to accuracy of a control epididymal maturation model). Cross-validation over  
514 ten iterations, where 10 histone PTMs were the minimal necessary features for greatest  
515 model accuracy. **(e)** The top 10 histone PTMs plotted (white bars), ranked by importance  
516 to normal epididymal maturation. The black bars are the corresponding importance of  
517 each histone PTM from a stress epididymal maturation model, showing that these histone  
518 PTMs contribute less or no accuracy in epididymal tissues recovering from stress.  
519 Importance is % increase in mean-squared error of epididymal maturation model when  
520 PTM values were randomly permuted. **(f)** Cross-validation of the stress epididymal  
521 maturation model, where 10 histone PTMs were the minimal necessary features for

522 greatest model accuracy. **(g)** The top 10 histone PTMs, ranked by importance to stress  
523 recovery in epididymal tissue, demonstrating the top histone PTMs changing during  
524 stress recovery are largely distinct from those changing in control epididymal tissues,  
525 suggesting stress recovery programs a new allostatic set point in the caput epididymis.  
526 **(d,f)** Error bars represent mean  $\pm$  SEM, N=10 iterations. **(e,g)** Error bars represent SD  
527 used to scale importance values, with Random Forests analysis performed on N=6  
528 epididymal tissues/treatment/age.  
529

# Supplementary Figure 3

**a**

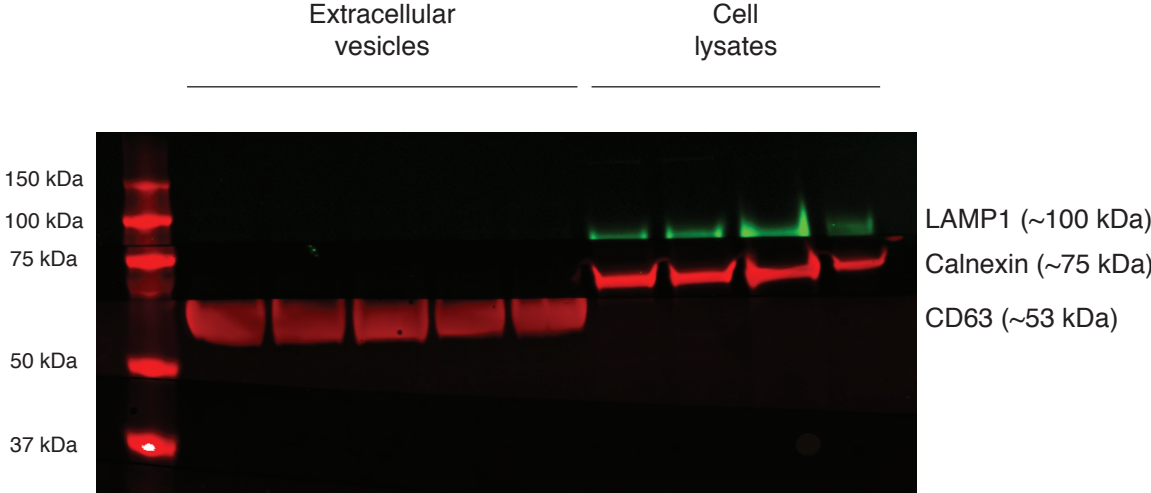

**b**

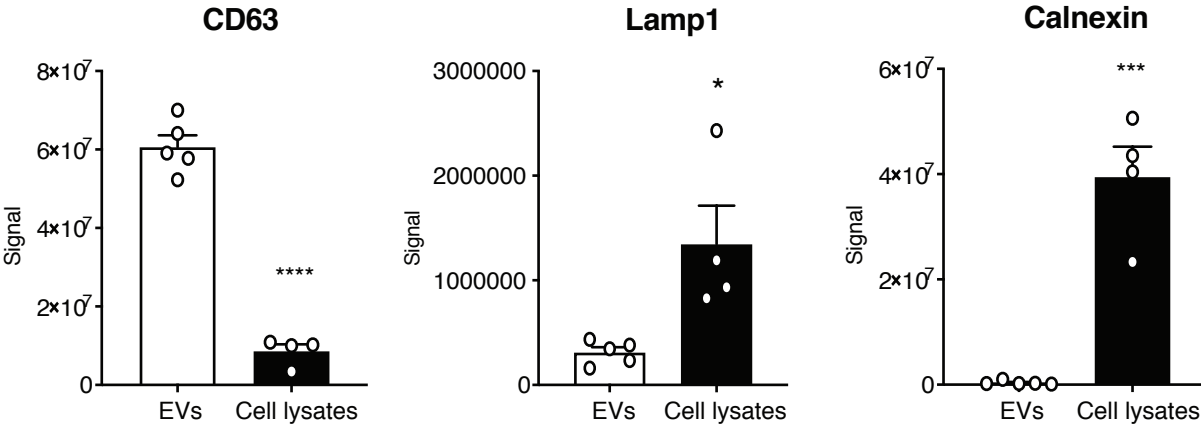

530 **Supplementary Figure 3. Validation of extracellular vesicles (EV) isolated from**  
531 **culture media of DC2 caput epididymal epithelial cells. (a)** Representative western  
532 blot and **(b)** quantification of CD63, a known EV-enriched tetraspanin; Calnexin, an  
533 endoplasmic reticulum-associated protein; and Lamp1, a lysosome-associated protein.  
534 CD63 (unpaired two-tailed Student's t-test,  $t(7)=13.96$ ,  $****p=2.2902 \times 10^{-6}$ ) is typically  
535 found on EV membranes, while Calnexin (unpaired two-tailed Student's t-test,  
536  $t(7)=7.678$ ,  $***p=0.0001$ ) and Lamp1 (unpaired two-tailed Student's t-test,  $t(7)=3.138$ ,  
537  $*p=0.0164$ ) are typically found from cell lysates, suggesting minimal cellular  
538 contamination in isolated EV populations. N=5 cellular lysate samples and 4 EV samples.  
539 Error bars represent mean  $\pm$  SEM, with individual data points overlaid. Source data are  
540 provided as a Source Data file.  
541  
542



# Supplementary Figure 4

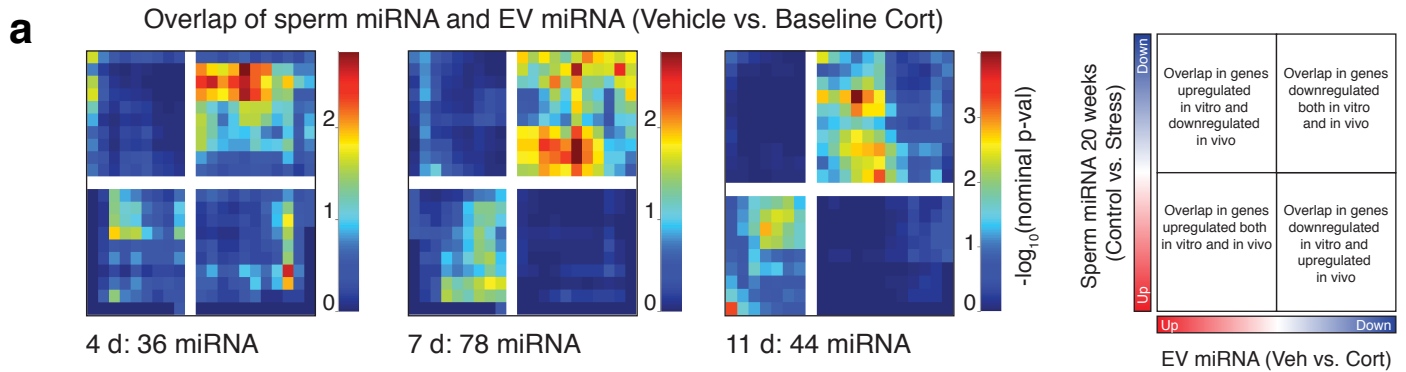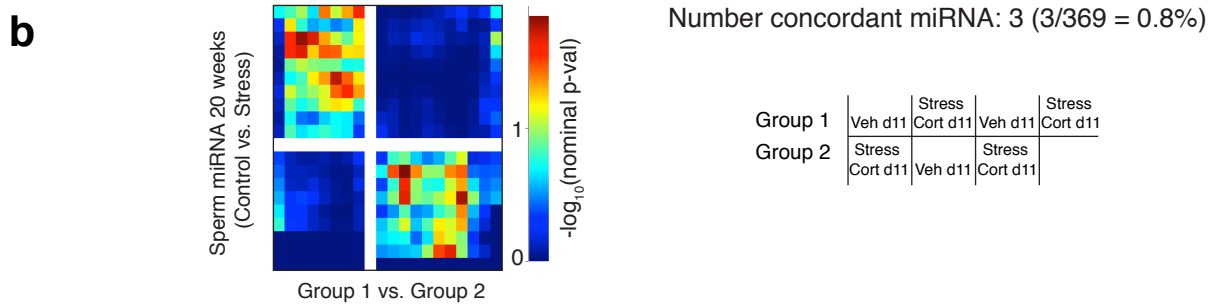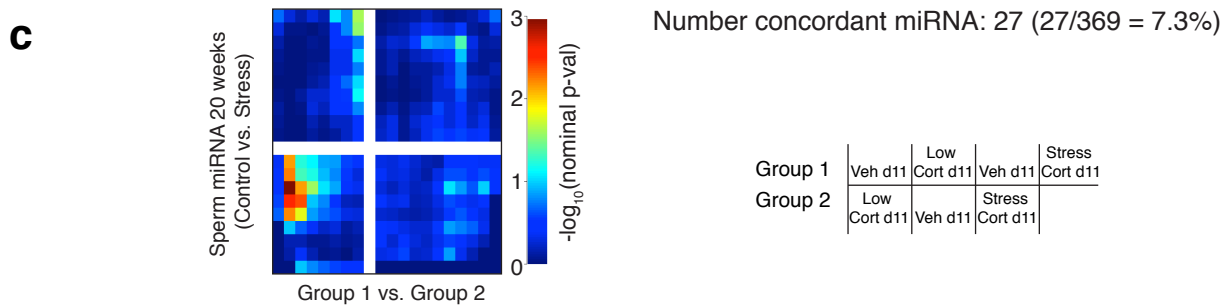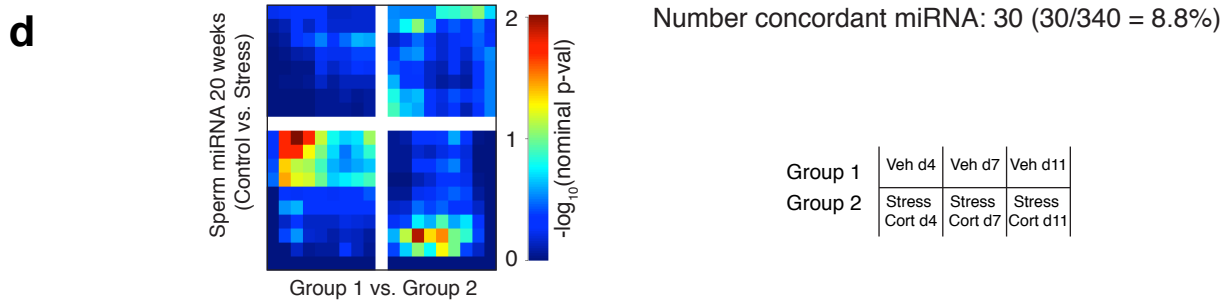

543 **Supplementary Figure 4. Quantification of miRNA overlap between paternal stress**  
544 **sperm and baseline corticosterone treatment of DC2 EVs.** (a) To quantify concordant  
545 miRNA overlap between our mouse model and cell culture, RRHO analysis was used.  
546 Following small RNA sequencing, the differential expression profiles of sperm 12-weeks  
547 post-stress were plotted against the differential expression miRNA profiles of secreted  
548 EVs 1, 4, or 8 days following baseline corticosterone treatment (left, middle, and right  
549 respectively). Overlap data are plotted as sperm miRNA ratios increasing down the y-axis  
550 and EV miRNA ratios increasing left along the x-axis, with each pixel representing the -  
551  $\log_{10}(\text{nominal p-value})$  of overlapping miRNA via the hypergeometric distribution and  
552 the color coding according to degree of significance (as shown). Each RRHO heatmap is  
553 divided into four quadrants, where the bottom left and upper right squares represent  
554 concordant miRNA changes in both models as quantified below each heatmap. (b-d) To  
555 ensure RRHO-identified significant overlap between sperm and DC2 EV miRNA were  
556 detected above chance, EV miRNA samples were randomly assigned to groups and the  
557 same analysis was rerun on nominal p-values of all detected miRNA, where  
558 randomization occurred (b) using Vehicle and Stress Cort EV miRNA samples within  
559 time at 8 days post-treatment, (c) using Vehicle, Baseline Cort, and Stress Cort EV  
560 miRNA samples within time at 8 days post-treatment, and (d) using Vehicle and Stress  
561 Cort EV miRNA samples across time such that 1 Vehicle and 1 Stress Cort sample were  
562 randomly selected from 1, 4 and 8 days post-treatment. The samples included in each  
563 group for this randomized comparison are depicted under each heatmap. The number of  
564 concordant EV miRNA for each analysis was quantified and used to calculate the  
565 percentage of concordant miRNA over total identified miRNA (where total miRNA are

566 miRNA present in every sample in that comparison), showing that the percentage for  
567 each of these randomized analyses (0.8-8.8%) were below that identified at 8-days post-  
568 treatment in the Stress Cort comparison with sperm (31.4%). (N=3-4 EVs/treatment/time,  
569  $\max -\log_{10}(\text{p-value}) = 4$ ).  
570  
571

# Supplementary Figure 5

**a**

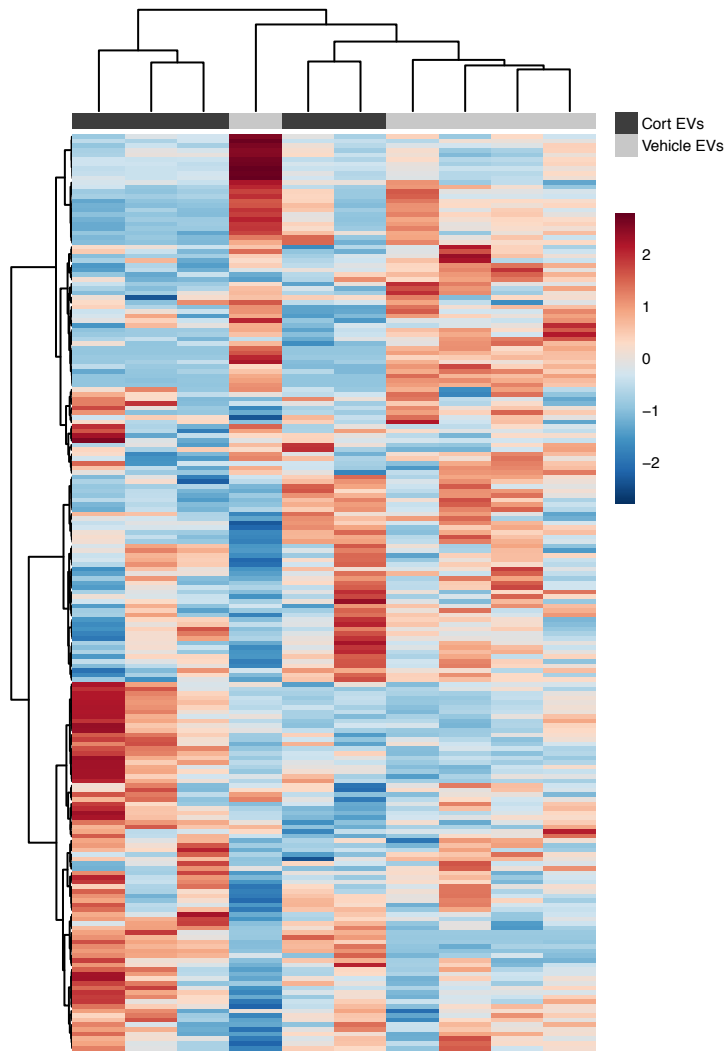

572 **Supplementary Figure 5. DC2 EV protein cargo 1-d following corticosterone**  
573 **treatment. (a)** Heatmap and hierarchical clustering of all detected proteins from  
574 proteomics mass spectrometry of DC2 EVs collected acutely 1 day following  
575 corticosterone treatment (N=5 EVs/treatment), showing the effects of corticosterone  
576 treatment on EV protein content is greater at 8 days post-treatment (as shown in Figs. 2d,  
577 e).  
578  
579

# Supplementary Figure 6

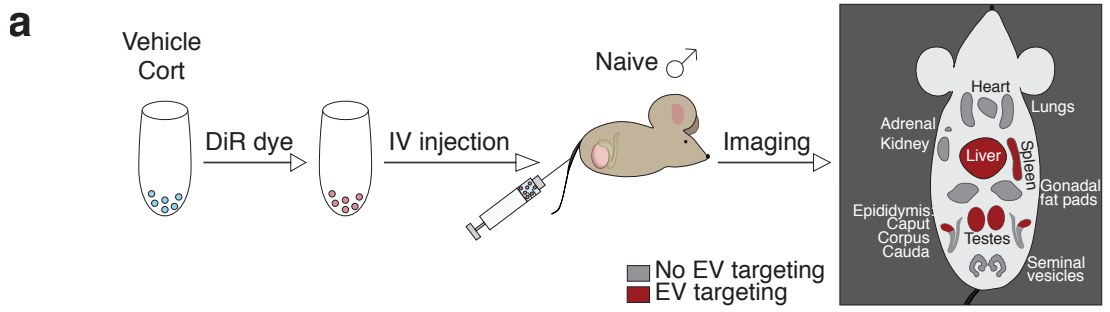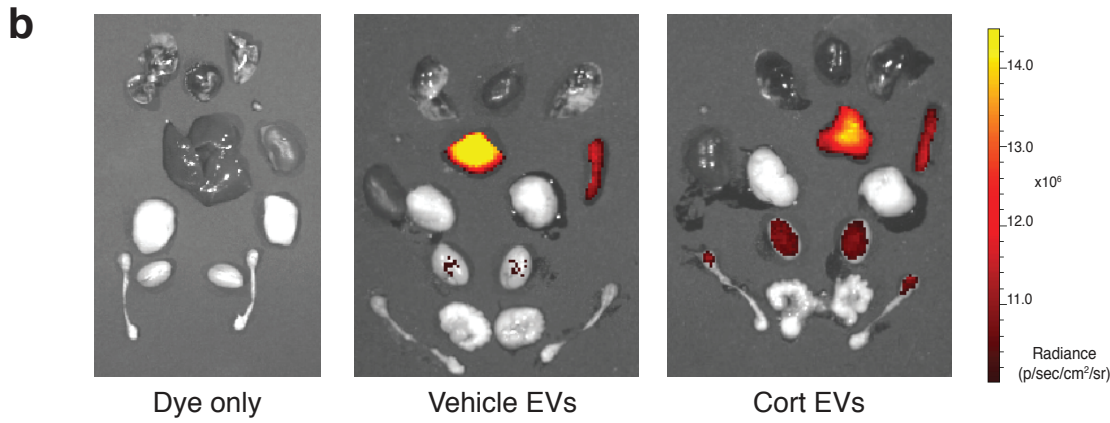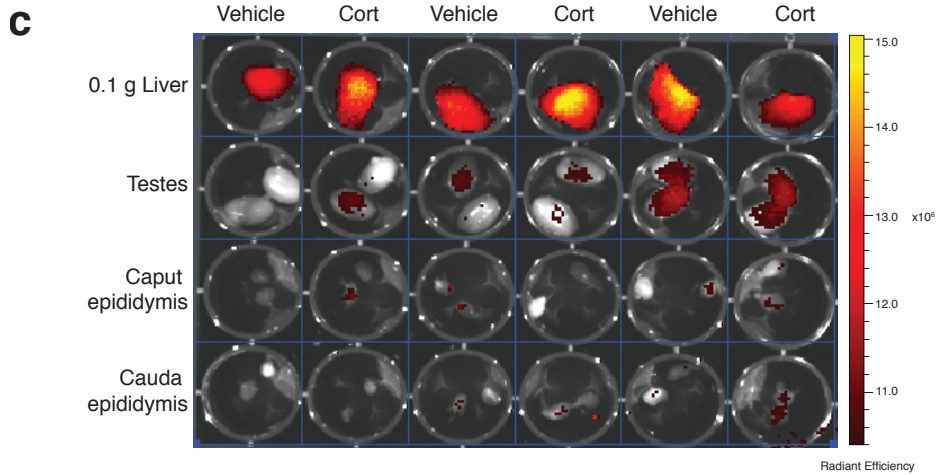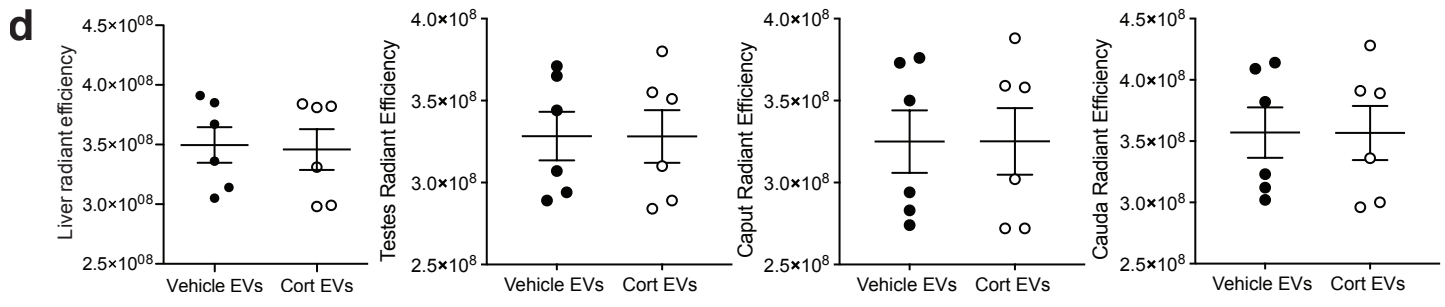

580 **Supplementary Figure 6. Imaging and quantification of tissues from naive male**  
581 **mice injected i.v. with DiR-labeled EVs secreted from DC2 caput epididymal**  
582 **epithelial cells. (a)** To ensure EVs treated with stress corticosterone levels maintained  
583 tissue targeting specificity *in vivo*, we fluorescently labeled vehicle- and stress  
584 corticosterone-treated DC2 EVs with the near-infrared lipophilic DiR dye and injected  $5$   
585  $\times 10^7$  EVs intravenously into naïve male mice. 24-hrs post-injection, tissues were  
586 removed and imaged to evaluate the bio-distribution of DC2 caput EEC EV targeting. **(b)**  
587 Representative images of the biodistribution of DC2 EVs following the i.v. infusion of  
588 DiR dye-labeled EVs collected 8 days after vehicle or stress corticosterone treatment,  
589 demonstrating that EVs retained their tissue targeting selectivity. **(c)** Liver, testes, caput  
590 and cauda epididymal tissue from mice injected with DC2 EVs collected 8-days after  
591 either vehicle or corticosterone treatment. **(d)** There were no statistically significant  
592 differences in total radiant efficiency of liver (unpaired two-tailed Student's t-test,  $t(10) =$   
593  $0.1691$ ,  $p = 0.8691$ ), testes (unpaired two-tailed Student's t-test,  $t(10) = 0.007625$ ,  $p =$   
594  $0.9941$ ), caput epididymis (unpaired two-tailed Student's t-test,  $t(10) = 0.005991$ ,  $p =$   
595  $0.9953$ ), or cauda epididymis (unpaired two-tailed Student's t-test,  $t(10) = 0.01103$ ,  $p =$   
596  $0.9914$ ), showing no changes to EV tissue targeting selectivity by DC2 treatment.  $N=6$   
597 mice/EV treatment. Error bars represent mean  $\pm$  SEM.  
598  
599

# Supplementary Figure 7

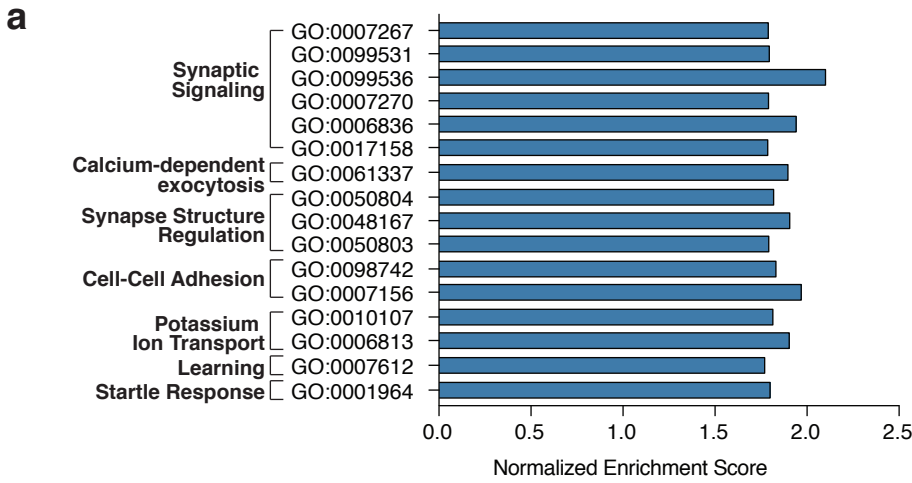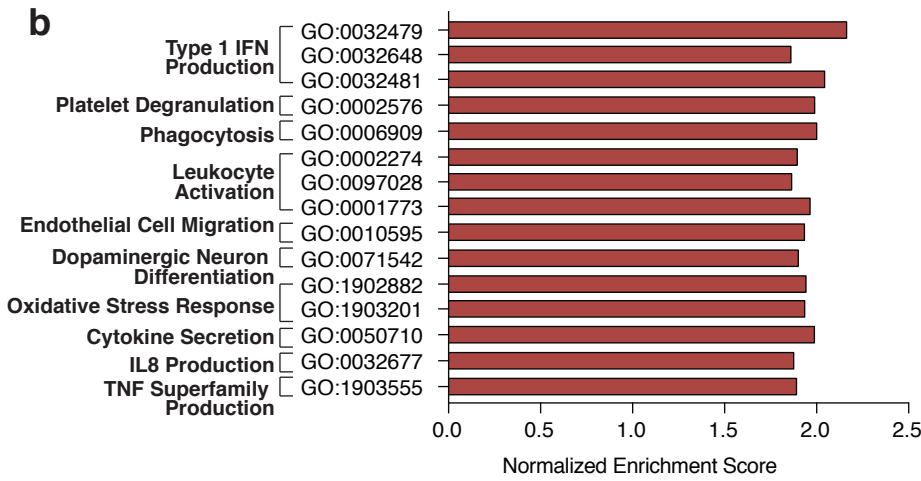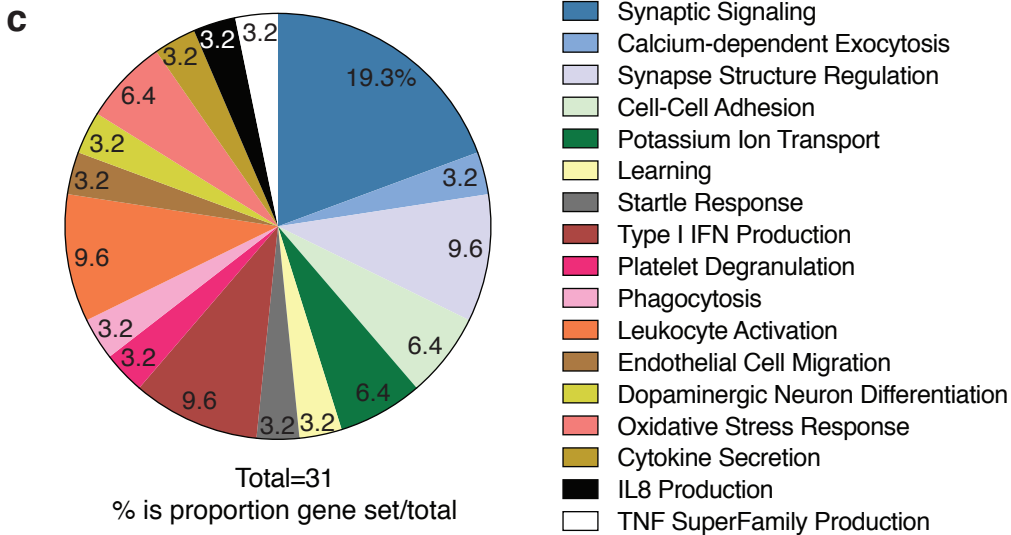



600 **Supplementary Figure 7. ICSI of sperm incubated with corticosterone-treated DC2**  
601 **EVs alter the embryonic brain transcriptome. (a)** Following RNA sequencing  
602 analysis, total GO terms significantly enriched and **(b)** decreased in Cort<sup>EV</sup> E12.5 brains  
603 determined by GSEA were grouped under parent terms. (N=6 embryos/EV treatment,  
604 FDR< 0.05). The top three significant clusters of GO terms enriched in EV<sup>Cort</sup> E12.5  
605 brains are presented in Figure 3d. **(c)** Proportion of significant child GO terms collapsed  
606 into parent terms, showing that Synaptic Signaling (19.3%) encompasses the majority of  
607 significantly altered gene sets in the E12.5 brain by ICSI of sperm incubated with EVs  
608 secreted 8-days following corticosterone treatment of DC2 cells.  
609  
610

# Supplementary Figure 8

**a**

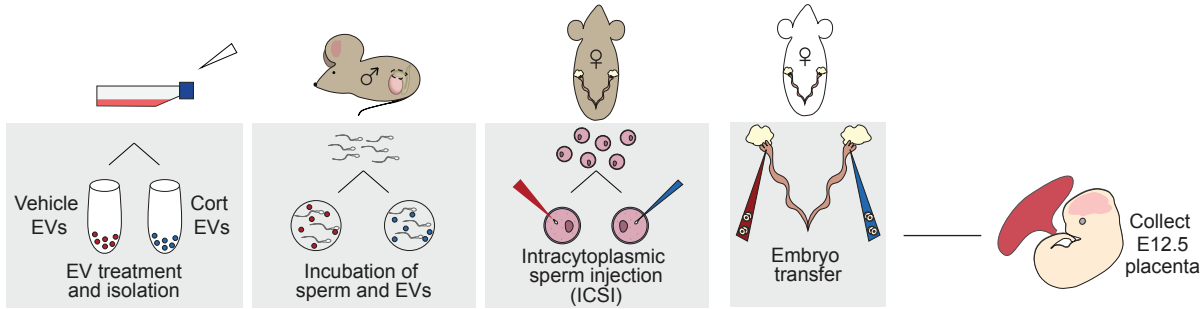

**b**

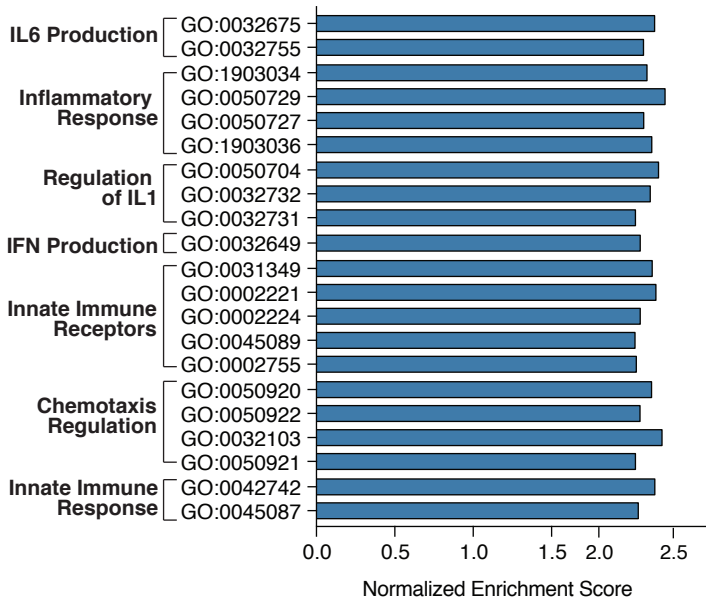

**c**

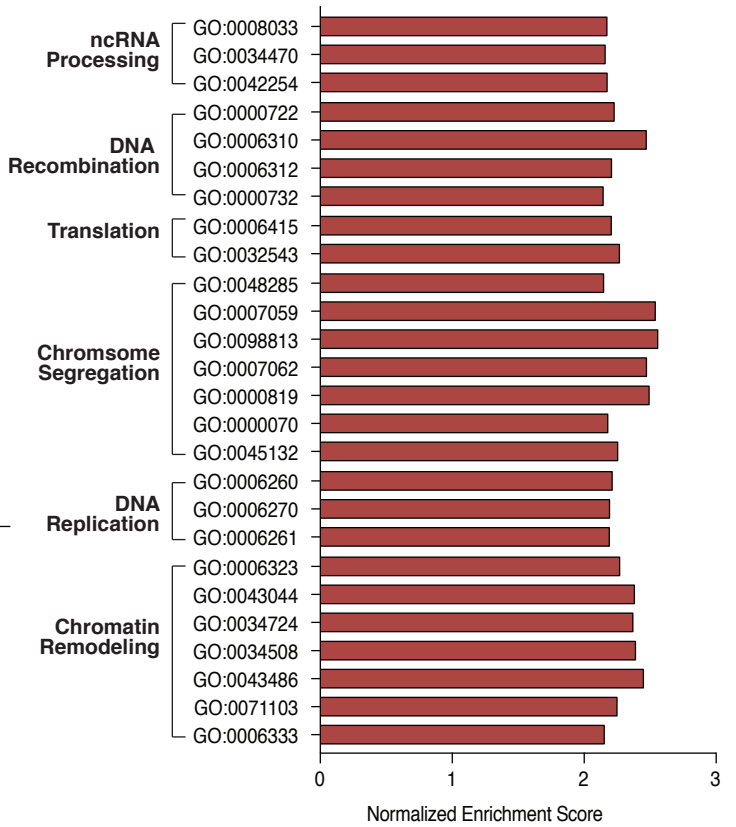

**d**

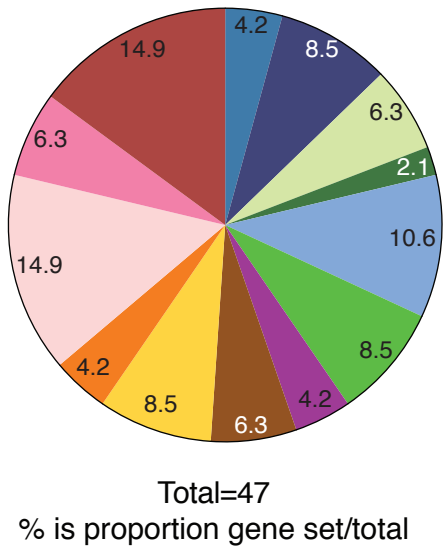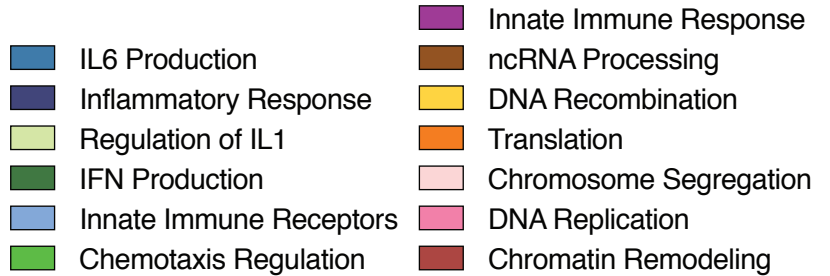

611 **Supplementary Figure 8. ICSI of sperm incubated with corticosterone-treated DC2**  
612 **EVs alters the placenta transcriptome. (a)** To assess a causal relationship between the  
613 significant changes to secreted EV bioactive cargo and intergenerational transmission, we  
614 utilized the assisted reproductive technology, ICSI, to inject caput epididymal sperm  
615 from naïve adult male mice. Prior to injection, sperm samples were divided into two  
616 pools and briefly incubated with secreted EVs isolated 8 days post vehicle or  
617 corticosterone treatment (EV<sup>Veh</sup> sperm or EV<sup>Cort</sup> sperm). Sperm were then microinjected  
618 into super-ovulated oocytes obtained from the same donor females. Cleaved 2-cell  
619 zygotes from both EV-treatment groups were then transferred into the designated right or  
620 left side of the same naïve foster females, and changes to offspring neurodevelopment  
621 were assessed at mid-gestation (E12.5). Therefore, sperm, oocytes and intrauterine  
622 environments for offspring development were the same for both treatment groups, with  
623 the only difference being the EV population the sperm were incubated with prior to ICSI.  
624 Resulting placentas were collected at E12.5 for transcriptional analysis. GO terms,  
625 clustered under parent group terms to reduce redundancy, were **(b)** enriched and **(c)**  
626 decreased in Cort<sup>EV</sup> placentas compared to Veh<sup>EV</sup> placentas (N=6 placentas/EV  
627 treatment, FDR < 0.05), showing caput epididymal epithelial cell-secreted EVs can  
628 impact placental regulation/function as well as embryo development. **(d)** Pie chart  
629 showing proportion of significantly enriched child gene sets under each parent term in  
630 total significant gene sets, showing Chromatin Remodeling and Chromosome  
631 Segregation encompass the majority of gene sets altered in the E12.5 placenta by ICSI of  
632 Cort DC2 EVs.  
633  
634

# Supplementary Figure 9

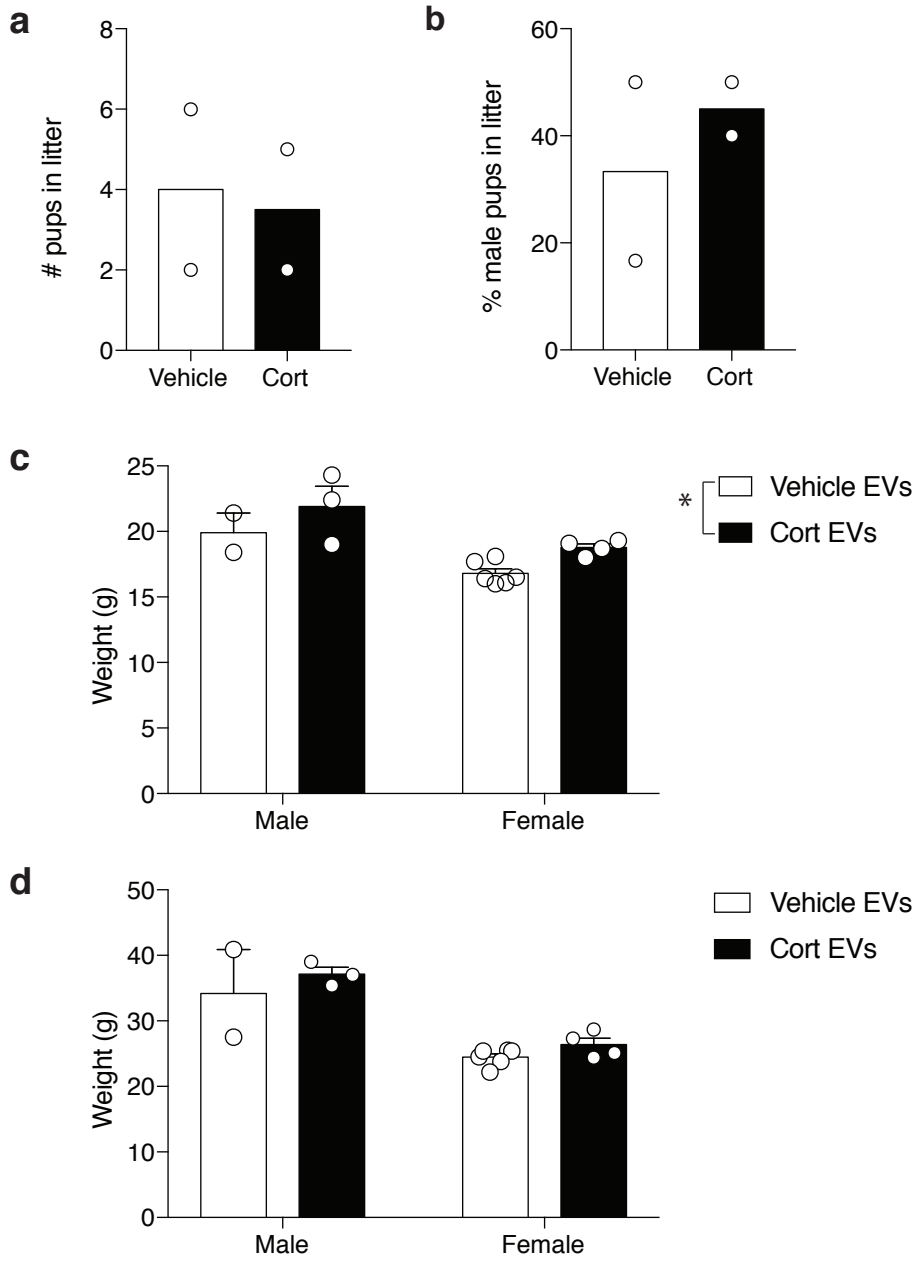

635 **Supplementary Figure 9. ICSI of sperm incubated with corticosterone-treated DC2**  
636 **EVs produce offspring with normal litter characteristics but altered physiological**  
637 **outcomes. (a)** Litter sizes and **(b)** sex ratios produced from ICSI of sperm incubated with  
638 vehicle- or corticosterone-treated EVs, with average values indicated (N=2 litters/EV  
639 treatment). **(c)** There was a significant effect of both EV treatment and sex on body  
640 weights at 4 weeks (two-way ANOVA, main effect of sex ( $F(1, 11) = 14.34$ ,  $p = 0.003$ ),  
641 main effect of EV treatment ( $F(1, 11) = 5.845$ ,  $*p = 0.0341$ ). N=2-3 males and 4-5  
642 females/EV treatment. **(d)** Adults weights were no longer different in both male and  
643 female offspring at 15 weeks of age (two-way ANOVA, main effect of sex ( $F(1, 11) =$   
644  $31.73$ ,  $p = 0.0002$ ), effect of EV treatment ( $F(1, 11) = 1.771$ ,  $p = 0.2102$ ). N=2 males for  
645  $EV^{Veh}$ , 3 males for  $EV^{Cort}$ , 5 females for  $EV^{Veh}$  and 4 females for  $EV^{Cort}$ . Error bars  
646 represent mean  $\pm$  SEM.
